# Supplementary material
Source: PubMed Central journal article supplement (PMC4052772)

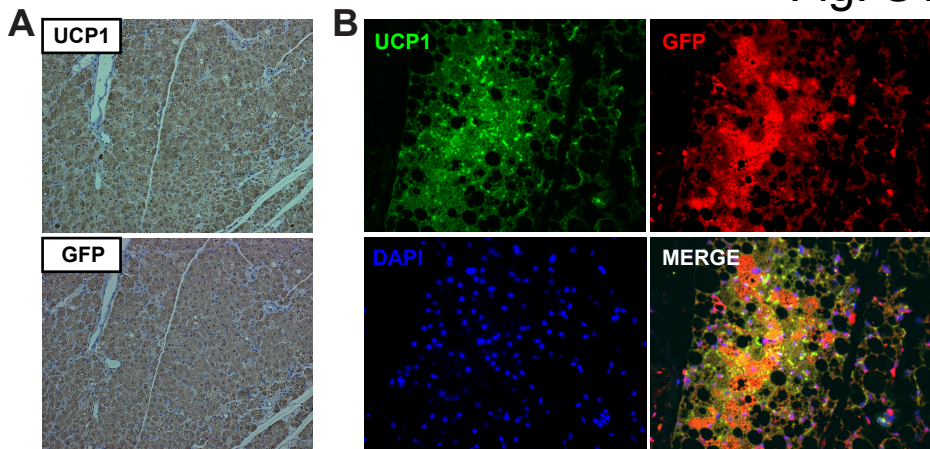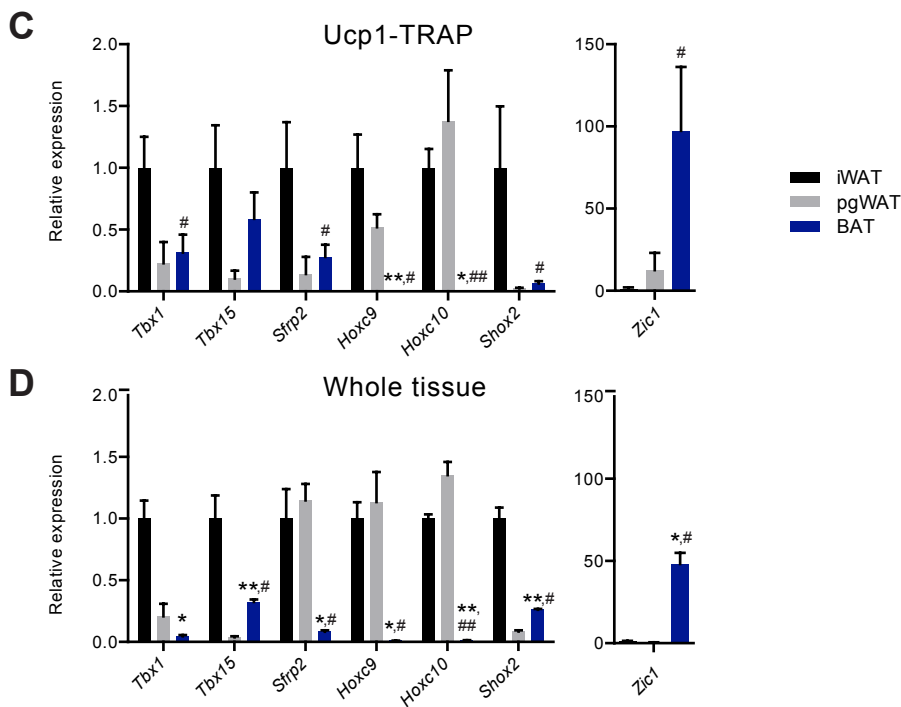

A

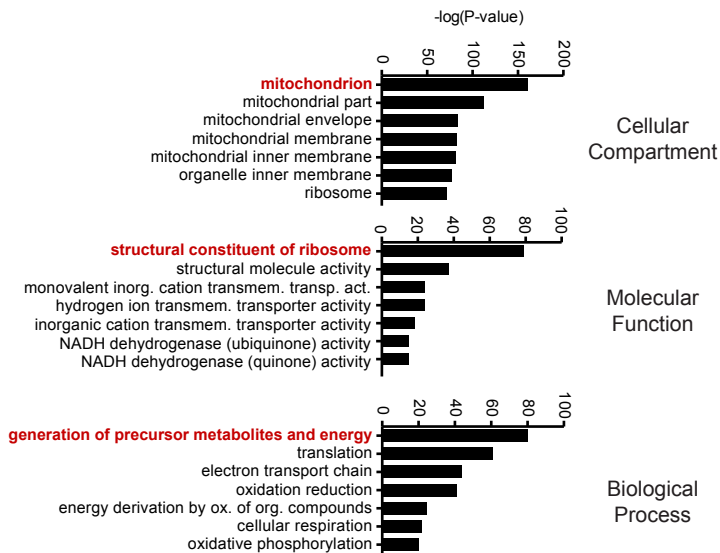

B

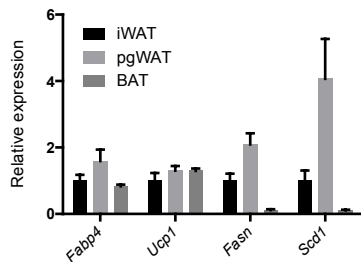

C

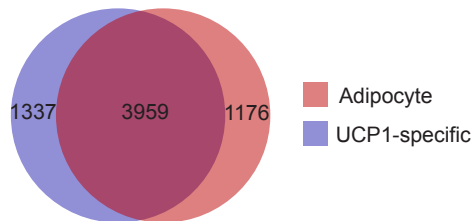

A

Ucp1-TRAP-Seq  
iWAT-selective genes

|                      | iWAT | pgWAT | BAT |
|----------------------|------|-------|-----|
| <i>Expi</i>          | 1.0  | 0.0   | 0.0 |
| <i>Acta2</i>         | 1.0  | 0.0   | 0.0 |
| <i>Lcn2</i>          | 1.0  | 0.1   | 0.1 |
| <i>Fxyd3</i>         | 1.0  | 0.0   | 0.0 |
| <i>Ltf</i>           | 1.0  | 0.0   | 0.0 |
| <i>Tagln</i>         | 1.0  | 0.0   | 0.1 |
| <i>Krt5</i>          | 1.0  | 0.0   | 0.0 |
| <i>Ii17b</i>         | 1.0  | 0.0   | 0.0 |
| <i>Krt14</i>         | 1.0  | 0.0   | 0.0 |
| <i>Myh11</i>         | 1.0  | 0.1   | 0.1 |
| <i>Myl9</i>          | 1.0  | 0.0   | 0.0 |
| <i>Cnn1</i>          | 1.0  | 0.0   | 0.0 |
| <i>Sico1a5</i>       | 1.0  | 0.3   | 0.9 |
| <i>Ripk4</i>         | 1.0  | 0.1   | 0.2 |
| <i>Dsg2</i>          | 1.0  | 0.0   | 0.0 |
| <i>Muc15</i>         | 1.0  | 0.1   | 0.1 |
| <i>Cd24a</i>         | 1.0  | 0.0   | 0.1 |
| <i>Clca2</i>         | 1.0  | 0.0   | 0.1 |
| <i>Ehf</i>           | 1.0  | 0.0   | 0.0 |
| <i>1600029D21Rik</i> | 1.0  | 0.0   | 0.0 |
| <i>Crispld2</i>      | 1.0  | 0.1   | 0.0 |
| <i>Plekhb1</i>       | 1.0  | 0.0   | 0.0 |
| <i>Cldn3</i>         | 1.0  | 0.1   | 0.2 |
| <i>Marcks1</i>       | 1.0  | 0.0   | 0.0 |
| <i>Irx1</i>          | 1.0  | 0.3   | 0.5 |
| <i>Cdh1</i>          | 1.0  | 0.1   | 0.2 |
| <i>Serinc2</i>       | 1.0  | 0.1   | 0.2 |
| <i>Lama3</i>         | 1.0  | 0.1   | 0.2 |
| <i>Pdlim3</i>        | 1.0  | 0.0   | 0.0 |
| <i>Atp6v1b1</i>      | 1.0  | 0.0   | 0.0 |
| <i>Irx2</i>          | 1.0  | 0.0   | 0.0 |

B

Ucp1-TRAP-Seq  
pgWAT-selective genes

|                      | iWAT | pgWAT | BAT |
|----------------------|------|-------|-----|
| <i>Ugt1a6b</i>       | 0.3  | 1.0   | 0.2 |
| <i>Exoc1</i>         | 0.9  | 1.0   | 1.1 |
| <i>Zdhhc24</i>       | 0.4  | 1.0   | 1.4 |
| <i>Klhl15</i>        | 1.0  | 1.0   | 0.9 |
| <i>Gata6</i>         | 0.1  | 1.0   | 0.0 |
| <i>Emcn</i>          | 0.4  | 1.0   | 0.7 |
| <i>Tnfrsf22</i>      | 0.9  | 1.0   | 0.5 |
| <i>Igfals</i>        | 0.7  | 1.0   | 1.9 |
| <i>Olfml1</i>        | 0.3  | 1.0   | 0.0 |
| <i>Esam</i>          | 0.4  | 1.0   | 0.4 |
| <i>Gulp1</i>         | 0.4  | 1.0   | 0.3 |
| <i>1700030K09Rik</i> | 0.5  | 1.0   | 0.6 |
| <i>6430550D23Rik</i> | 0.0  | 1.0   | 0.0 |
| <i>1700084E18Rik</i> | 1.0  | 1.0   | 1.9 |
| <i>Rspo1</i>         | 0.3  | 1.0   | 0.2 |
| <i>Prune2</i>        | 1.5  | 1.0   | 2.4 |
| <i>Car15</i>         | 1.6  | 1.0   | 1.7 |
| <i>Mustn1</i>        | 0.2  | 1.0   | 0.3 |
| <i>Mutyh</i>         | 0.6  | 1.0   | 0.6 |
| <i>Dpp4</i>          | 0.2  | 1.0   | 0.0 |
| <i>Ccdc46</i>        | 0.3  | 1.0   | 0.6 |
| <i>Lrrm4</i>         | 0.1  | 1.0   | 0.2 |
| <i>Kcnj15</i>        | 0.3  | 1.0   | 0.2 |
| <i>Pilp</i>          | 1.2  | 1.0   | 0.6 |
| <i>Zfp28</i>         | 0.5  | 1.0   | 0.8 |
| <i>B3gnt1</i>        | 0.9  | 1.0   | 1.0 |
| <i>Rad9b</i>         | 0.2  | 1.0   | 0.5 |
| <i>Pcdhb17</i>       | 1.2  | 1.0   | 0.9 |
| <i>9330179D12Rik</i> | 0.7  | 1.0   | 0.4 |
| <i>Cyth4</i>         | 0.3  | 1.0   | 0.4 |
| <i>Gm12824</i>       | 0.2  | 1.0   | 0.1 |

C

Ucp1-TRAP-Seq  
BAT-selective genes

|                      | iWAT | pgWAT | BAT |
|----------------------|------|-------|-----|
| <i>Mt2</i>           | 0.2  | 0.3   | 1.0 |
| <i>Gdf15</i>         | 0.0  | 0.1   | 1.0 |
| <i>Myc</i>           | 0.2  | 0.2   | 1.0 |
| <i>Hmga1</i>         | 1.1  | 0.7   | 1.0 |
| <i>Arhgdig</i>       | 0.1  | 0.1   | 1.0 |
| <i>Otud1</i>         | 0.2  | 0.3   | 1.0 |
| <i>Gfra1</i>         | 0.2  | 0.1   | 1.0 |
| <i>Gnmt</i>          | 0.1  | 0.3   | 1.0 |
| <i>Nup43</i>         | 0.3  | 0.2   | 1.0 |
| <i>Mylpf</i>         | 0.1  | 0.2   | 1.0 |
| <i>Rsph1</i>         | 0.1  | 0.8   | 1.0 |
| <i>Psmc3ip</i>       | 0.5  | 0.5   | 1.0 |
| <i>Srgn</i>          | 1.3  | 1.5   | 1.0 |
| <i>Cxcr4</i>         | 2.2  | 1.2   | 1.0 |
| <i>Cpne5</i>         | 0.7  | 1.1   | 1.0 |
| <i>Gtsf1l</i>        | 0.6  | 0.5   | 1.0 |
| <i>1810010H24Rik</i> | 0.4  | 0.6   | 1.0 |
| <i>Kcnh6</i>         | 0.0  | 0.0   | 1.0 |
| <i>Rnaset2a</i>      | 0.4  | 0.8   | 1.0 |
| <i>Zic1</i>          | 0.0  | 0.0   | 1.0 |
| <i>Fosl1</i>         | 0.1  | 0.1   | 1.0 |
| <i>E230016K23Rik</i> | 0.5  | 0.8   | 1.0 |
| <i>Pcdhgb2</i>       | 2.2  | 0.9   | 1.0 |

Fig. S3

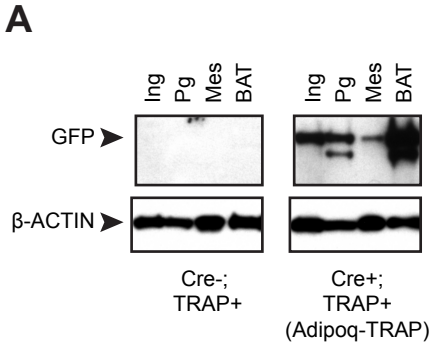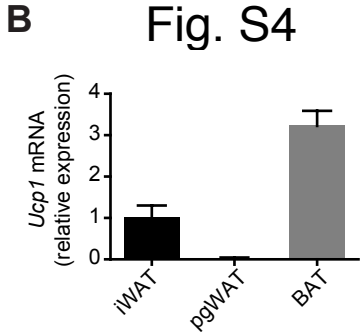

Fig. S5

A

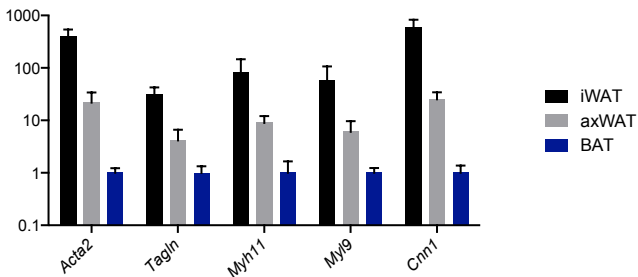

B

|               | iWAT |      |      | pgWAT |     |     | BAT |     |                          |  |
|---------------|------|------|------|-------|-----|-----|-----|-----|--------------------------|--|
| <i>Cspg4</i>  | 2.9  | 3.7  | 2.0  | 6.4   | 4.4 | 1.7 | 1.9 | 1.2 | Pericyte markers         |  |
| <i>Pdgfrb</i> | 0.5  | 0.5  | 0.1  | 0.7   | 0.4 | 0.0 | 0.0 | 0.3 |                          |  |
| <i>Pecam1</i> | 0.2  | 1.0  | 0.2  | 2.6   | 0.8 | 0.7 | 0.7 | 0.7 |                          |  |
| <i>Cdh5</i>   | 0.6  | 0.8  | 0.3  | 2.1   | 0.5 | 0.1 | 0.0 | 0.1 | endothelial cell markers |  |
| <i>Thbd</i>   | 0.0  | 0.0  | 0.0  | 2.9   | 0.1 | 0.2 | 0.0 | 0.0 |                          |  |
| <i>Vwf</i>    | 0.0  | 0.2  | 0.0  | 0.3   | 0.2 | 0.1 | 0.1 | 0.1 |                          |  |
| <i>Acta2</i>  | 90.0 | 38.4 | 25.7 | 2.2   | 0.9 | 0.0 | 0.0 | 0.6 | SMC markers              |  |
| <i>Myh11</i>  | 7.8  | 5.4  | 3.0  | 0.4   | 0.3 | 0.1 | 0.0 | 0.0 |                          |  |
| <i>Myl9</i>   | 9.0  | 2.6  | 3.5  | 1.4   | 0.4 | 0.0 | 0.0 | 0.0 |                          |  |
| <i>Cnn1</i>   | 7.8  | 3.5  | 2.9  | 0.5   | 0.0 | 0.0 | 0.2 | 0.2 |                          |  |
| <i>Tagln</i>  | 21.7 | 8.8  | 7.2  | 1.3   | 0.8 | 0.0 | 0.0 | 0.0 |                          |  |

Fig. S6

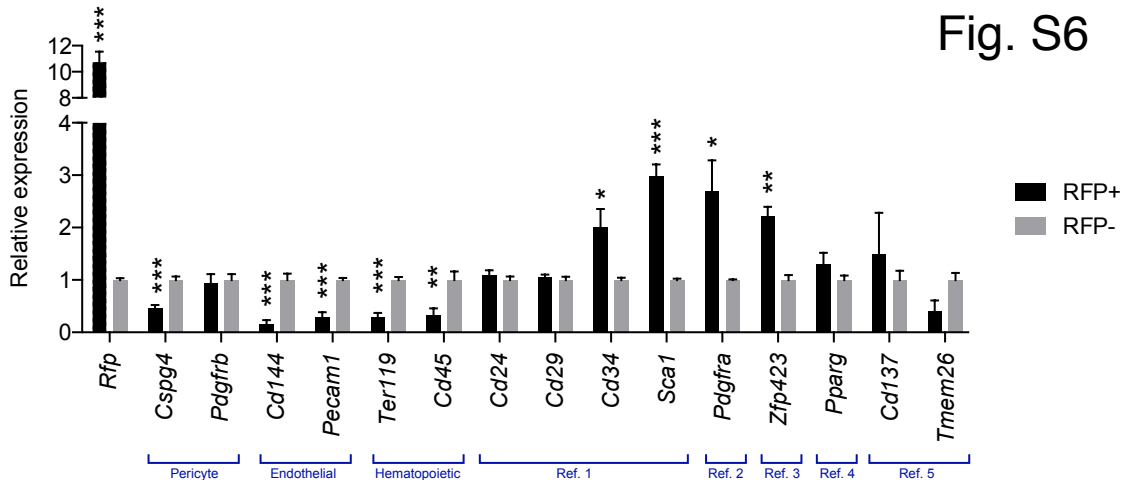

Supplement: NIHMS580878-supplement-08.pdf [file NIHMS580878-supplement-08.pdf]
